# Supplementary material for: Children’s physical activity and sedentary time compared using assessments of accelerometry counts and muscle activity level
Source: PeerJ. 2018 Aug 21;6:e5437. doi: 10.7717/peerj.5437 (PMC6108314; doi:10.7717/peerj.5437)
Supplement: Supplemental Information 1 — Sheet 1. ACC counts vs. EMG level in different PA tasks; Sheet 2. ACC vs. EMG in different PA intensities; Sheet 3. Daily PA in ACC and EMG during 1 day with and 1 day without structured exercise; Sheet 4. ACC using 5 different published cut-off points and varying time windows (1–60 s) compare to EMG; Sheet 5. PA task instructions; Sheet 6. Day-to-day reliability of EMG from five participants. [file peerj-06-5437-s001.xlsx]

## Sheet: 1. ACC counts vs. EMG
ACC counts														% ACC normlized by walking													EMG amplitudes													%EMG normlized each channel by walking
Row Labels	Jump for height	Standing long jump	Single leg hops	Static Squat	Sitting	Game of tag	Crawling	Stair negotiation	Trampoline jumping	Climbing	Swinging	Balancing	Walking	Jump for height	Standing long jump	Single leg hops	Static Squat	Sitting	Game of tag	Crawling	Stair negotiation	Trampoline jumping	Climbing	Swinging	Balancing	Walking	Jump for height	Standing long jump	Single leg hops	Static Squat	Sitting	Game of tag	Crawling	Stair negotiation	Trampoline jumping	Climbing	Swinging	Balancing	Walking	Jump for height	Standing long jump	Single leg hops	Static Squat	Sitting	Game of tag	Crawling	Stair negotiation	Trampoline jumping	Climbing
CEMG_0011						7989.71	815.248	2452.62	15283.7	1075.56	2448.82	453.953	1346.98						593.158	60.5243	182.083	1134.67	79.8495	181.801	33.7016	100						105.125	46.75	65	41	30.5	31.5	23.5	44.75						259.284	115.602	160.444	106.771	76.6793
CEMG_0021						3314.36	864.884	2885.59	16095.3	945.168	5454.88	364.036	1616.1						205.084	53.5168	178.553	995.936	58.4846	337.534	22.5256	100						91.625	48.5	39.75	45.75	28	36	21.5	13						719.803	376.399	310.913	361.444	229.998
CEMG_0031						6747.62	975.305	2488.9	17226.8	989.033	1865.47	248.734	862.028						782.761	113.141	288.726	1998.41	114.733	216.405	28.8545	100						52.625	40.375	29.5	29.75	25.5	20.5	23.5	26						240.619	158.13	107.441	115.716	86.5609
CEMG_0041						4051.98	782.715	2642.81	17845.5	767.064	4600.97	253.782	1263.61						320.668	61.943	209.148	1412.27	60.7043	364.114	20.084	100						77.125	106.75	44	58	42	21.5	34.875	45.75						170.328	226.628	96.3461	132.476	90.3622
CEMG_0051						3207.67	1071.9	2153.16	7677.03	1509.73	3442.22	256.029	1526.6						210.118	70.2148	141.042	502.883	98.8948	225.482	16.7712	100						37.625	30.125	49.75	55.75	33.25	13.75	21	22.5						181.424	139.653	252.986	279.167	166.944
CEMG_0062						3826.5	880.392	2195.38	15011.2	1009.02	5515.03	359.161	1019.2						375.442	86.3806	215.402	1472.84	99.001	541.113	35.2394	100						98.75	64.75	54.75	46.25	25.75	12.75	30.25	15						653.489	460.279	373.628	312.859	181.174
CEMG_0072						3486.17	751.583	2355.51	17065	971.325	3682.08	308.05	1016.68						342.897	73.9253	231.687	1678.5	95.539	362.168	30.2996	100						65.125	53.375	56.5	28.5	27.75	29.25	25.375	20						404.544	275.202	374.088	151.725	135.901
CEMG_0082						5586.77	890.763	2520.18	16307.8	693.499	6839.58	466.917	677.884						824.149	131.403	371.771	2405.7	102.303	1008.96	68.8785	100						153.75	94.75	65.25	65.5	37	51.25	23	26.75						647.908	382.987	288.879	290	134.061
CEMG_0092						5584.9	806.58	1780.4	10685	812.132	4364.98	382.114	2033.22						274.682	39.67	87.5657	525.522	39.9431	214.683	18.7935	100						66.25	98.25	50	69.5	32.5	42.5	33.125	31.25						294.444	349.015	173.838	238.51	114.141
CEMG_0101						2171.27	876.535	2193.57	8220.71	579.437	2749.92	410.787	1206.1						180.024	72.6752	181.873	681.595	48.0423	228.001	34.0592	100						68.875	56.625	75.75	50.25	28.75	32.25	22.5	58.25						150.728	106.556	138.842	101.746	62.5316
CEMG_0111						4017.42	893.791	2127.77	7804.1	1231.19	2469.26	367.338	1349.28						297.746	66.2423	157.697	578.392	91.2479	183.007	27.2248	100						81.125	60.875	71.5	65.25	43.25	42	34	48						195.816	143.839	180.2	186.999	123.994
1001	209.307	204.443	364.032	68.9562	14.438								767.596	27.2679	26.6342	47.4249	8.9834	1.88093								100	146.25	116	101.625	42.75	1.5								32.75	498.575	390.18	316.306	157.127	5.34061
2001	209.258	260.125	869.643	82.6844	9.12061								990.855	21.119	26.2526	87.7669	8.34476	0.920479								100	89.75	88.5	94.25	36.25	8.75								29.75	376.429	340.524	394.667	158.024	33.7143
3001	221.2	236.23	672.056	37.162	37.9801								720.461	30.7026	32.7887	93.2813	5.15809	5.27164								100	174.25	194.75	108.25	38.5	2								21.75	811.848	895.692	499.153	181.828	9.44664
4001	142.644	177.454	426.151	24.414	5.67022								728.007	19.5937	24.3754	58.5367	3.35354	0.778869								100	125.875	101	82.5625	29.5	3.625								25.875	586.832	452.142	352.538	148.762	19.6865
5001	154.88	173.135	618.857	35.5077	11.7589								1860.7	8.32374	9.30487	33.2595	1.9083	0.631963								100	170.125	123.5	111.062	31.5	2.5								39	458.899	318.155	282.045	84.2495	7.24141
6001	250.731	201.407	923.764	77.5662	54.5929								1168.9	21.4501	17.2304	79.0283	6.63581	4.67044								100	145.25	97.5	116.625	57.375	4.375								20.375	900.111	528.15	595.826	367.872	27.852
7001	164.476	222.161	665.735	65.3304	49.0089								1699.79	9.67623	13.0699	39.1656	3.84343	2.88323								100	96.375	132.25	87.875	47	2								25.25	446.782	547.024	368.927	226.135	10.1935
8001	227.841	233.879	796.483	59.7072	7.01624								1318.9	17.2751	17.7329	60.3899	4.52703	0.531976								100	222.125	164	104.688	63.5	2.125								27	934.137	664.097	408.947	274.365	10.2328
9001	156.227	106.349	426.183	52.0199	9.60675								874.13	17.8723	12.1663	48.7551	5.95105	1.09901								100
10001	129.484	74.1388	658.855	37.8966	12.6805								1352.57	9.5732	5.48133	48.7114	2.80182	0.937509								100	125.25	119	85.1875	43.125	2.875								22.125	611.863	562.531	395.573	213.865	14.6749
11001	176.084	227.918	729.009	28.2251	5.45724								1218.03	14.4565	18.712	59.8513	2.31727	0.448038								100
12001	191.379	228.948	518.11	102.966	3.21694								1244.25	15.3811	18.4005	41.6405	8.27535	0.258545								100	134.75	118	95.875	30	0.5								32	474.154	412.171	302.706	113.377	1.6369
13001	182.341	195.757	526.194	45.3977	1.15398								1035.24	17.6134	18.9093	50.828	4.38522	0.111469								100	125.5	113.125	94.25	42.75	3.875								27.75	646.006	506.777	381.836	226.17	19.9105
14001	154.058	196.332	623.951	174.33	28.3934								1558.6	9.88441	12.5967	40.0328	11.185	1.82172								100	100.25	92.5	71.125	36.25	6.5								21	538.587	454.105	340.29	198.397	29.7312
AVE	183.565	195.591	629.93	63.7259	17.8639	4544.03	873.609	2345.08	13565.7	962.105	3948.47	351.9	1218.23	17.1564	18.1182	56.3337	5.54786	1.58899	400.612	75.4215	204.141	1216.97	80.7948	351.206	30.5847	100	137.979	121.677	96.1146	41.5417	3.38542	81.6364	63.7386	54.7045	50.5	32.2045	30.2955	26.6023	29.3859	607.019	505.962	386.568	195.848	15.8051	356.217	248.572	223.419	207.037	127.486
SD	35.878	50.9951	166.967	39.0441	17.4733	1731.49	90.3024	298.68	4094.68	258.377	1556.3	77.3607	361.663	6.68726	7.46181	18.4722	2.79668	1.61549	228.576	26.3809	75.8488	638.623	24.9881	243.714	14.2453	0	37.545	30.6537	13.1346	10.4984	2.29838	31.0101	25.232	14.02	13.9028	6.17335	12.3242	5.35719	11.1342	183.823	157.452	87.1987	75.3926	10.3553	216.246	126.241	101.549	93.0673	50.1058
[truncated: 3 more columns]

## Sheet: 2. Intensities ACC VS. EMG
	Column Labels
	ACC																																EMG
	Walking				Balancing				Swinging				Climbing				Trampoline jumping				Stair negotiation				Crawling				Game of tag				Walking				Balancing				Swinging				Climbing				Trampoline jumping
Row Labels	Sedentary	Light activity	Moderate activity	Vigorous activity	Sedentary	Light activity	Moderate activity	Vigorous activity	Sedentary	Light activity	Moderate activity	Vigorous activity	Sedentary	Light activity	Moderate activity	Vigorous activity	Sedentary	Light activity	Moderate activity	Vigorous activity	Sedentary	Light activity	Moderate activity	Vigorous activity	Sedentary	Light activity	Moderate activity	Vigorous activity	Sedentary	Light activity	Moderate activity	Vigorous activity	Sedentary	Light activity	Moderate activity	Vigorous activity	Sedentary	Light activity	Moderate activity	Vigorous activity	Sedentary	Light activity	Moderate activity	Vigorous activity	Sedentary	Light activity	Moderate activity	Vigorous activity	Sedentary
CEMG_0011	4.54545	18.1818	4.54545	72.7273	8.62069	73.2252	9.33063	8.82353	1.23457	20.9877	16.0494	61.7284	0	28.5714	33.3333	38.0952	0	0.833333	0	99.1667	0	4.34783	4.34783	91.3043	0	22.7273	9.09091	68.1818	2.5	6.66667	3.33333	87.5	0	52.2388	43.7811	3.9801	0	61.4158	36.147	2.43722	0	81.8523	16.3955	1.75219	0	30.8	42.4	26.8	0
CEMG_0021	0	14.2857	0	85.7143	8.33333	70.8333	9.72222	11.1111	0	9.87654	3.7037	86.4198	0	75.7576	15.1515	9.09091	0.833333	1.66667	0.833333	96.6667	0	8.69565	0	91.3043	0	12.5	0	87.5	9.83607	18.8525	5.7377	65.5738	0	51.9048	46.6667	1.42857	0	31.2499	54.614	14.1362	0	18.25	42.375	39.375	0	27.1144	61.9403	10.9453	0
CEMG_0031	4.7619	23.8095	42.8571	28.5714	6.66667	86.6667	0	6.66667	1.23457	46.9136	14.8148	37.037	0	80.6452	6.45161	12.9032	0	0.833333	0.833333	98.3333	8.33333	8.33333	8.33333	75	0	10.5556	16.1111	73.3333	0.819672	6.65301	0.819672	91.7077	0	61.1872	31.9635	6.84931	0	46.6667	34.3333	19	0	56.375	38.625	5	0	26.6484	39.8352	33.5165	0
CEMG_0041	0	19.0476	19.0476	61.9048	3.33333	93.5417	0	3.125	0	12.3457	8.64198	79.0123	0	89.4737	7.89474	2.63158	0	0	0	100	0	8.69565	0	91.3043	0	7.14286	7.14286	85.7143	1.63934	11.4754	1.63934	85.2459	0	55.7789	43.7186	0.502513	0	74.397	19.5827	6.02032	0	17.3967	42.0526	40.5507	0	52.7311	38.8655	8.40336	0
CEMG_0051	0	5.88235	0	94.1176	3.84615	67.6282	24.359	4.16667	0	18.5185	8.64198	72.8395	0	73.1707	7.31707	19.5122	0.826446	12.3967	5.78512	80.9917	0	21.0526	31.5789	47.3684	5.55556	5.55556	7.14286	81.746	3.27869	14.7541	8.19672	73.7705	0	50.9677	47.7419	1.29032	0	68.9985	29.4595	1.54202	0	59.7744	34.0852	6.14035	0.222717	41.6481	49.4432	8.68597	0
CEMG_0062	0	21.0526	0	78.9474	7.69231	51.9231	23.8462	16.5385	1.23457	4.93827	2.46914	91.358	0	57.1429	21.4286	21.4286	4.23729	9.32203	0.847458	85.5932	0	0	5	95	0	0	8.33333	91.6667	1.63934	19.6721	0.819672	77.8689	0	46.6292	52.809	0.561798	0	44.4977	34.5769	20.9253	0	12.0301	26.4411	61.5288	0	11.8033	40.6557	47.541	0
CEMG_0072	0	38.0952	9.52381	52.381	3.84615	76.9231	7.69231	11.5385	0	12.8571	7.14286	80	0	69.697	18.1818	12.1212	0.833333	0.833333	0	98.3333	0	4.54545	9.09091	86.3636	0	30	10	60	9.13934	28.2104	13.2514	49.3989	0	54.8913	43.4783	1.63044	0	74.183	23.8562	1.96078	0	51.8797	40.2256	7.89474	0	46.0199	44.5274	9.45274	0
CEMG_0082	7.14286	35.7143	7.14286	50	3.125	55.7692	24.7596	16.3462	1.23457	1.23457	6.17284	91.358	0	84	12	4	0.833333	4.16667	0.833333	94.1667	0	8	0	92	6.25	20	15.8333	57.9167	2.5	27.5	5.83333	64.1667	0	54.8387	39.7849	5.37634	0.25641	92.0769	7.41026	0.25641	0.250313	75.8448	21.2766	2.62828	0	86.3281	13.2812	0.390625	0.5
CEMG_0092	0	14.8148	3.7037	81.4815	1.63934	92.7382	1.60092	4.02152	1.23457	8.64198	14.8148	75.3086	2.5641	82.0513	15.3846	0	0	0.826446	0	99.1736	0	11.5385	23.0769	65.3846	0	16.6667	12.5	70.8333	1.66667	19.112	3.31967	75.9016	0	51.4894	45.9574	2.55319	0	45.4988	46.9015	7.5997	0	42.409	29.1092	28.4818	0	40.4092	53.9642	5.6266	0
CEMG_0101	0	17.6471	5.88235	76.4706	2.77778	77.451	5.71895	14.0523	1.23457	35.8025	8.64198	54.321	0	89.2857	10.7143	0	3.30579	9.09091	1.65289	85.9504	0	4.54545	18.1818	77.2727	4.54545	10.7955	4.54545	80.1136	11.4754	35.2459	7.37705	45.9016	0	51.9231	48.0769	0	0	94.9873	5.01266	0	0	73.25	20	6.75	0	87.4644	12.2507	0.2849	0
CEMG_0111	0	14.2857	0	85.7143	19.5238	68.5714	0	11.9048	1.23457	38.2716	13.5802	46.9136	0	77.1429	8.57143	14.2857	0.832871	8.32871	4.16435	86.6741	2.32558	39.5349	18.6047	39.5349	0	8.33333	7.14286	84.5238	4.09836	18.0328	4.09836	73.7705	0	56.5217	40.5797	2.89855	0	75.9895	23.6226	0.38797	0	95.995	3.75469	0.250313	0	59.6817	33.9523	6.36605	0
[truncated: 15 more columns]

## Sheet: 3. Exercise effects
ID	Training_Duration_ACC	No training_Duration_ACC	Training_Sedentary_ACC	No training_Sedentary_ACC	Training_light_ACC	No training_light_ACC	Training_Moderate_ACC	No training_Moderate_ACC	Training_Vigorous_ACC	No training_Vigorous_ACC	Training_MVPA_ACC	No training_MVPA_ACC	Training_Duration_EMG	No training_Duration_EMG	Training_Sedentary_EMG	No training_Sedentary_EMG	Training_light_EMG	No training_light_EMG	Training_Moderate_EMG	No training_Moderate_EMG	Training_Vigorous_EMG	No training_Vigorous_EMG	Training_MVPA_EMG	No training_MVPA_EMG	Average of Duration/min_ACC	Average of Sedentary/%_ACC	Average of Light/%_ACC	Average of Moderate/%_ACC	Average of Vigorous/%_ACC	Average of MVPA/%_ACC	Average of Duration/min_EMG	Average of Sedentary/%_EMG	Average of Light/%_EMG	Average of Moderate/%_EMG	Average of Vigorous/%_EMG	Average of MVPA/%_EMG
1001	539.452	539.755	28.5938	40.6666	60.3853	51.4586	5.32948	4.35383	5.70022	3.56644	11.0297	7.92027													539.604	34.6302	55.9219	4.84165	4.63333	9.47498
2001	540.235	539.993	41.7411	47.3154	50.8112	46.2043	2.86912	2.68522	4.58134	3.79635	7.45046	6.48157	537.625		17.7597		54.858		15.0985		12.2838		27.3823		540.114	44.5282	48.5077	2.77717	4.18884	6.96601	537.625	17.7597	54.858	15.0985	12.2838	27.3823
3001	539.582	539.68	31.9229	49.1031	42.6256	41.1355	5.42086	4.91031	20.0618	4.86399	25.4827	9.7743		522.407		32.6993		38.683		13.8944		14.7234		28.6178	539.631	40.513	41.8805	5.16559	12.4629	17.6285	522.407	32.6993	38.683	13.8944	14.7234	28.6178
4001	534.56	495.701	41.9972	43.3225	47.1884	49.8789	4.77028	2.82428	6.07977	3.98426	10.8501	6.80854	540.83	540.577	50.4528	43.1785	33.6811	40.0869	10.2733	11.516	5.59276	5.21862	15.8661	16.7346	515.13	42.6598	48.5336	3.79728	5.03201	8.8293	540.704	46.8157	36.884	10.8947	5.40569	16.3003
5001	540.524	540.167	33.486	32.9065	56.8892	56.2326	4.39388	7.03487	5.27266	3.84141	9.66654	10.8763	541.381	540.249	40.8378	33.4954	48.1197	58.2132	8.30999	6.64175	2.73252	1.64961	11.0425	8.29136	540.345	33.1963	56.5609	5.71437	4.55703	10.2714	540.815	37.1666	53.1665	7.47587	2.19106	9.66693
6001	540.4		40.1092		50.6107		2.54441		6.75426		9.29867		539.139	536.351	36.793	24.4787	40.5428	38.1404	12.0279	16.6764	10.6363	20.7045	22.6643	37.3808	540.4	40.1092	50.6107	2.54441	6.75426	9.29867	537.745	30.6358	39.3416	14.3522	15.6704	30.0226
7001	539.586	539.819	42.4399	57.3341	48.7874	35.8917	4.77217	4.07544	4.03087	2.7324	8.80304	6.80784	539.954	540.384	66.8166	66.766	24.0466	24.0914	6.66946	6.67649	2.46737	2.46615	9.13683	9.14264	539.702	49.887	42.3395	4.42381	3.38163	7.80544	540.169	66.7913	24.069	6.67297	2.46676	9.13973
8001	479.963	479.493	39.6385	39.1038	52.1915	49.8965	4.37534	4.37963	3.80238	6.62158	8.17772	11.0012	479.557	479.191	42.0023	42.5462	43.6498	38.3679	8.89529	10.3737	5.45253	8.71219	14.3478	19.0859	479.728	39.3712	51.044	4.37748	5.21198	9.58946	479.374	42.2743	41.0089	9.63451	7.08236	16.7169
9001	540.075	539.57	40.6425	42.5339	47.3083	46.5649	6.38801	5.18932	5.69366	5.74532	12.0817	10.9346													539.822	41.5882	46.9366	5.78866	5.71949	11.5082
10001	540.166	540.479	43.7829	48.3368	42.7184	37.513	5.415	4.62553	8.09936	9.52859	13.5144	14.1541	540.542		40.7331		38.441		11.6673		9.15859		20.8259		540.322	46.0598	40.1157	5.02027	8.81398	13.8342	540.542	40.7331	38.441	11.6673	9.15859	20.8259
11001	539.702	539.572	54.2893	49.4374	40.439	44.6651	3.84472	2.96532	1.43598	2.96532	5.2807	5.93063													539.637	51.8633	42.552	3.40502	2.20065	5.60566
12001	539.915	540.497	40.8861	46.6237	52.7861	48.5201	3.28755	2.45145	3.05604	2.40519	6.34359	4.85664	540.563	538.457	54.0735	58.3487	39.0462	36.585	4.88121	3.88356	1.99903	1.18276	6.88024	5.06633	540.206	43.7549	50.6531	2.8695	2.73061	5.60011	539.51	56.2111	37.8156	4.38239	1.5909	5.97328
13001	425.145	410.325	28.4609	22.9696	62.0964	63.6081	4.52786	3.53378	4.93949	9.93115	9.46735	13.4649	416.345	419.604	27.2295	21.0486	49.4742	50.8489	13.9319	14.2032	9.36436	13.8993	23.2962	28.1025	417.735	25.7152	62.8523	4.03082	7.43532	11.4661	417.974	24.139	50.1616	14.0676	11.6318	25.6994
14001	540.254	539.643	35.1687	28.908	54.604	56.7969	5.87687	9.26539	4.39608	5.04964	10.273	14.315													539.948	32.0383	55.7004	7.57113	4.72286	12.294

## Sheet: 4. Method&Epoch effects
ID	EMGSedentary	EMGLight	EMGModerate	EMGVigorous	EvensonSedentary	EvensonLight	EvensonModerate	EvensonVigorous	PateSedentary	PateLight	PateModerate	PateVigorous	PuyauSedentary	PuyauLight	PuyauModerate	PuyauVigorous	SirardSedentary	SirardLight	SirardModerate	SirardVigorous	Evenson1sSedentary	Evenson1sLight	Evenson1sModerate	Evenson1sVigorous	Evenson7.5sSedentary	Evenson7.5sLight	Evenson7.5sModerate	Evenson7.5sVigorous	Evenson15sSedentary	Evenson15sLight	Evenson15sModerate	Evenson15sVigorous	Evenson30sSedentary	Evenson30sLight	Evenson30sModerate	Evenson30sVigorous	Evenson60sSedentary	Evenson60sLight	Evenson60sModerate	Evenson60sVigorous
1001					34.6302	55.9219	4.84165	4.63333	45.2394	41.6987	10.0077	3.08126	70.9995	25.46	3.49815	0.0695149	86.0114	11.4441	1.78381	0.787784	51.4065	37.9694	4.19302	6.43385	39.2166	50.71	4.66796	5.42098	34.6302	55.9219	4.84165	4.63333	30.9011	59.6748	5.28179	4.17014	47.7416	52.2167	0.0695152	0
2001	17.7597	54.858	15.0985	12.2838	44.5282	48.5077	2.77717	4.18884	55.5213	35.5477	5.64679	3.28628	78.1557	18.3518	3.1012	0.393368	90.5366	6.54937	1.50439	1.41161	59.4299	32.3304	3.02246	5.22008	48.7867	43.879	2.84656	4.48971	44.5282	48.5077	2.77717	4.18884	40.1771	53.3679	2.82344	3.65651	58.5529	41.0556	0.347089	0.0462757
3001	32.6993	38.683	13.8944	14.7234	40.513	41.8805	5.16559	12.4629	48.6437	30.7849	10.3311	10.2623	67.0592	22.075	8.64064	2.24711	78.5947	11.6746	3.28945	6.46326	53.7279	30.6108	4.11488	11.5473	44.173	38.9965	4.26217	12.5787	40.513	41.8805	5.16559	12.4629	36.6446	45.8648	5.65203	11.9071	50.3579	47.3477	1.66796	0.648653
4001	46.8157	36.884	10.8947	5.40569	42.6598	48.5336	3.79728	5.03201	56.0144	33.2497	7.85362	2.90503	78.7237	17.604	3.69503	0	88.7602	8.88478	1.81244	0.565322	60.5962	30.0207	3.6409	5.74424	47.7212	43.1906	3.60746	5.49189	42.6598	48.5336	3.79728	5.03201	37.1923	54.363	4.28696	4.22919	58.7613	41.2615	0	0
5001	37.1666	53.1665	7.47587	2.19106	33.1963	56.5609	5.71437	4.55703	42.7039	43.7913	10.665	2.86832	69.4921	27.113	3.16899	0.254459	85.8012	11.7523	1.22598	1.24911	48.5744	39.7014	5.22194	6.50315	36.7356	52.7209	5.32107	5.23952	33.1963	56.5609	5.71437	4.55703	31.0448	59.1289	5.73765	4.16368	44.8322	54.942	0.25446	0
6001	30.6358	39.3416	14.3522	15.6704	40.1092	50.6107	2.54441	6.75426	54.728	34.1414	5.64397	5.50519	78.1829	16.0067	5.18135	0.647669	88.1755	6.61548	1.98927	3.23834	57.091	33.7491	3.04959	6.11029	44.3885	46.1001	3.07643	6.45356	40.1092	50.6107	2.54441	6.75426	35.3442	54.6817	3.88601	6.10659	58.5215	40.8494	0.416358	0.23131
7001	66.7913	24.069	6.67297	2.46676	49.887	42.3395	4.42381	3.38163	59.5687	29.7859	8.01384	2.6636	78.5379	18.6684	2.70993	0.1158	88.6597	8.9866	1.32021	1.06547	62.9241	29.0352	4.0634	3.97922	53.7203	38.7495	3.71729	3.82174	49.887	42.3395	4.42381	3.38163	46.181	46.601	3.65938	3.6133	61.815	38.1007	0.115799	0
8001	42.2743	41.0089	9.63451	7.08236	39.3712	51.044	4.37748	5.21198	48.6212	39.1102	8.70283	3.57041	74.5207	21.3923	4.09164	0	86.9497	9.92757	2.31947	0.807916	53.8744	36.5073	3.83126	5.78815	43.436	46.9925	4.10373	5.47248	39.3712	51.044	4.37748	5.21198	34.1859	57.22	3.80403	4.79528	51.2791	48.7261	0	0
9001					41.5882	46.9366	5.78866	5.71949	50.2484	35.1038	10.8601	3.82058	73.3112	22.3222	4.39956	0	84.6808	12.1568	2.17662	1.01879	56.9613	31.3015	4.80144	6.93948	45.6753	42.8725	5.31416	6.14781	41.5882	46.9366	5.78866	5.71949	36.6792	52.4248	5.55724	5.41845	52.703	47.3303	0	0
10001	40.7331	38.441	11.6673	9.15859	46.0598	40.1157	5.02027	8.81398	53.879	29.3813	9.83262	6.91681	71.508	20.9834	7.40275	0.115638	82.5431	11.1513	3.28508	3.03027	57.1539	30.5971	3.71543	8.53545	49.53	37.247	4.28005	8.95276	46.0598	40.1157	5.02027	8.81398	42.5201	43.1691	6.20026	8.14296	55.7757	44.1179	0.115638	0
11001					51.8633	42.552	3.40502	2.20065	61.4995	29.812	6.99531	1.71419	82.185	15.9365	1.87634	0.0231665	90.5703	7.96818	0.996049	0.48648	62.7099	31.6409	3.20396	2.44709	54.9094	39.8534	2.87223	2.37439	51.8633	42.552	3.40502	2.20065	49.1533	45.7256	3.01124	2.17748	63.5381	36.4601	0.0231666	0
12001	56.2111	37.8156	4.38239	1.5909	43.7549	50.6531	2.8695	2.73061	57.1289	35.1034	5.87821	1.89755	81.3794	16.4535	2.17522	0	91.1911	7.2897	1.08756	0.439784	59.7668	33.1364	3.18237	3.91348	47.7234	46.1871	2.74225	3.35538	43.7549	50.6531	2.8695	2.73061	39.7978	55.1186	2.63824	2.45278	60.1832	39.8242	0	0
13001	24.139	50.1616	14.0676	11.6318	25.7152	62.8523	4.03082	7.43532	38.8792	47.028	7.8275	6.29894	70.3695	23.005	5.31879	1.3404	85.0953	8.966	2.45023	3.5221	46.2674	42.0119	3.81002	7.91186	31.7657	56.5634	3.67853	8.01078	25.7152	62.8523	4.03082	7.43532	20.2378	68.5291	3.69674	7.59817	41.8132	56.8789	1.30992	0.0304633
14001					32.0383	55.7004	7.57113	4.72286	43.7273	40.3068	13.1047	2.89389	69.6783	26.8817	3.47269	0	82.8533	14.8876	1.92155	0.370327	49.7366	38.4037	5.6214	6.24013	36.5178	51.4872	6.57549	5.44073	32.0383	55.7004	7.57113	4.72286	27.733	60.9781	7.54872	3.79663	46.8524	53.181	0	0

## Sheet: 5. PA task instructions
Tasks instruction
− Walking. The child was instructed to walk from mark to mark (around 20−30 m) at their normal preferred speed. (Study I&II)
− Stair negotiation. The child was instructed to carry two beanbags one at a time up a 10 step staircase as quickly as possible. The task included the descents to retrieve the second beanbag. (Study I)
− Climbing. Starting from a designated place, the child was instructed to climb up the ladders as fast as possible, translate horizontally along the barred wall for about 3 m, and finally come down the ladders to floor. (Study I)
− Crawling. The child was instructed to crawl through a 4−5 m track as quickly as possible. The track was built on soft mats, and cones were used to outline the track. (Study I)
− Swinging. The child was instructed to swing as fast as possible in a swing. (Study I)
− Balancing. The child was instructed to walk back and forth on a padded balance beam (length*width*height: 300*10*18 cm). (Study I)
− Trampoline jumping. Children were instructed to jump “normally” on an indoor trampoline (2.3 m*4.0 m) using both legs. (Study I)
− Game of tag. The rules of the game comprise one player chasing to tag the others by touching them. The child had first a responsibility to try to tag other players for one minute and then the role was changed for another minute. The subjects were encouraged to be active in the play that was done outdoors in about 7*10 m area. (Study I)
− Sitting. The child was instructed to sit on the floor for about 30 seconds. (Study II)
− Static squat. The child was instructed to assume a static squatting posture for 30 seconds with a 90 degree knee angle. (Study II)
− Single leg hops. Single leg hopping about 20−30 m. The task was repeated once with each leg. (Study II)
− Jump for height. The child was asked to execute three counter-movement jumps reaching for maximal height with their hands. They were encouraged to jump higher than the previous one on each jump. (Study II)
− Standing long jump. The child was asked to execute three standing long jumps. Every jump was marked down with a line in order to encourage trying to beat the previous attempt. (Study II)

## Sheet: 6. EMG reliability
Day-to-day reliability of EMG in children (n=5)
Raw EMG	(mean)				(SD)						(mean)				(SD)
	Day1	Day2			Day1	Day2				EMG (%walking)
Sitting	3.4	2.6			1.92516	0.762398					Day1	Day2			Day1	Day2
Static squat	44.5	51.7			11.6082	15.3291				Sitting	19.4139	13.642			12.826	4.11088
Walking	24.75	23.5			4.08121	1.67705				Static squat	224.988	267.412			67.6023	97.7334
	Pearson r	Intraclass r	90% Lower conf limit	90% Upper conf limit							Pearson r	Intraclass r	90% Lower conf limit	90% Upper conf limit
Sitting	-0.0766485	-0.0524781	-0.838355	0.804261						Sitting	0.379262	0.220468	-0.734735	0.882561
Static squat	0.914267	0.880031	0.209663	0.987612						Static squat	0.939756	0.87934	0.206738	0.987537
Walking	0.817275	0.574639	-0.468905	0.948589
